# Supplementary material for: A randomised controlled study of the long-term effects of exercise training on mortality in elderly people: study protocol for the Generation 100 study
Source: HighWire-hosted journal article supplement (doi:10.1136/bmjopen-2014-007519), 2015-02-01
Supplement: bmjopen-2014-007519supp.pdf [file bmjopen-2014-007519supp.pdf]

## Questionnaire Q1

1. Gender: ☐ Female ☐ Male      2. Birth year:
3. Height:    cm      4. Weight:    kg

### Education

5. What is your highest level of education?
- ☐ Primary school
  - ☐ Realskole (Norwegian education)
  - ☐ Yrkesskole (Norwegian type of trade school education)
  - ☐ Handelsskole (Norwegian type of trade school education)
  - ☐ High school
  - ☐ College or University, less than 3 years
  - ☐ College or University, more than 3 years

### Housing and friends

6. Who do you live with? (One or more Xs)
- ☐ No one      ☐ Spouse/partner      ☐ Other people

### Exercise and physical activity

By exercise we mean going for walks, skiing, swimming and working out/sports. Physical activity includes both physical activity in daily life, planned activities and exercise training.

7. How often do you exercise? (on the average)
- ☐ Never
  - ☐ Less than once a week
  - ☐ Once a week
  - ☐ 2-3 times a week
  - ☐ Nearly every day
8. If you exercise as often as once or several times a week: How hard do you exercise? (average)
- ☐ I take it easy; I don't get out of breath or break a sweat
  - ☐ I push myself until I'm out of breath and break into a sweat
  - ☐ I practically exhaust myself

9. For how long do you exercise each time? (average)

- ☐ Less than 15 minutes ☐ 15-29 minutes ☐ 30 min.-1 hour ☐ More than 1 hour

10. Do you have at least 30 minutes of physical activity daily? ☐ Yes ☐ No

11. If you never or seldom are physically active. What is preventing you:

- ☐ Poor health / functional impairment  
☐ Availability of appropriate activities  
☐ Distance to recreational areas  
☐ Upkeep of recreational areas  
☐ Lack of safety  
☐ Not interested  
☐ Other

12. About how many hours do you sit during a normal day? ☐☐ hours

### Health and daily life

13. How is your health at the moment? ☐ Poor ☐ Not so good ☐ Good ☐ Very good

14. Do you smoke? (Put an X in only one box)

- ☐ No, I have never smoked  
☐ No, I quit smoking  
☐ Yes, cigarettes occasionally (parties/vacation, not daily)  
☐ Yes, cigars/cigarillos/pipe occasionally  
☐ Yes, cigarettes daily  
☐ Yes, cigars/cigarillos/pipe daily

15. Do you use, or have you used snuff?

- ☐ No, never  
☐ Yes, but I quit  
☐ Yes, occasionally  
☐ Yes, daily

16. How many glasses of beer, wine or spirits do you usually drink in the course of two weeks: (do not include low-alcohol beer, write 0 if you do not drink alcohol)

Number of glasses: Beer: ☐☐ Wine: ☐☐ Spirits: ☐☐

17. Do you take medication for high blood pressure?

☐ Yes      ☐ No, but I have used      ☐ No, never used

18. Can you do the following daily tasks without the help of others?

|                                        |                              |                             |
|----------------------------------------|------------------------------|-----------------------------|
| Walk around indoors on the same floor  | <input type="checkbox"/> Yes | <input type="checkbox"/> No |
| Go to the toilet                       | <input type="checkbox"/> Yes | <input type="checkbox"/> No |
| Wash yourself                          | <input type="checkbox"/> Yes | <input type="checkbox"/> No |
| Take a bath or shower                  | <input type="checkbox"/> Yes | <input type="checkbox"/> No |
| Dress and undress yourself             | <input type="checkbox"/> Yes | <input type="checkbox"/> No |
| Go to bed and get up                   | <input type="checkbox"/> Yes | <input type="checkbox"/> No |
| Eat                                    | <input type="checkbox"/> Yes | <input type="checkbox"/> No |
| Prepare warm meals                     | <input type="checkbox"/> Yes | <input type="checkbox"/> No |
| Do light housework (ex: wash dishes)   | <input type="checkbox"/> Yes | <input type="checkbox"/> No |
| Do heavier housework (ex: wash floors) | <input type="checkbox"/> Yes | <input type="checkbox"/> No |
| Wash clothes                           | <input type="checkbox"/> Yes | <input type="checkbox"/> No |
| Do the shopping                        | <input type="checkbox"/> Yes | <input type="checkbox"/> No |
| Pay bills                              | <input type="checkbox"/> Yes | <input type="checkbox"/> No |
| Take medicines                         | <input type="checkbox"/> Yes | <input type="checkbox"/> No |
| Go out                                 | <input type="checkbox"/> Yes | <input type="checkbox"/> No |
| Take the bus                           | <input type="checkbox"/> Yes | <input type="checkbox"/> No |

19. Have you, during the last 12 months, had any kind of:

|                                                                                       |                              |                             |
|---------------------------------------------------------------------------------------|------------------------------|-----------------------------|
| Attack of wheezing or breathlessness?                                                 | <input type="checkbox"/> Yes | <input type="checkbox"/> No |
| Daily cough in periods?                                                               | <input type="checkbox"/> Yes | <input type="checkbox"/> No |
| Hayfever or nasal allergies?                                                          | <input type="checkbox"/> Yes | <input type="checkbox"/> No |
| Pain or stiffness in muscles or joints that has lasted at least 3 consecutive months? | <input type="checkbox"/> Yes | <input type="checkbox"/> No |

20. How many times have you, during the last 12 months, visited any of the following:

|                                                                                                         |                                                 |
|---------------------------------------------------------------------------------------------------------|-------------------------------------------------|
| General practitioner                                                                                    | <input type="text"/> <input type="text"/> times |
| Another specialist outside the hospital                                                                 | <input type="text"/> <input type="text"/> times |
| Chiropractor                                                                                            | <input type="text"/> <input type="text"/> times |
| Homeopath, acupuncturist, reflexologist, laying on of hands or other alternative treatment practitioner | <input type="text"/> <input type="text"/> times |

21. Have you had or do you have any of the following: (Put an X on each line)

**If Yes**, how  
old were you  
the first  
time?

|                                             |                              |                             |                                                 |
|---------------------------------------------|------------------------------|-----------------------------|-------------------------------------------------|
| Myocardial infarction (heart attack)        | <input type="checkbox"/> Yes | <input type="checkbox"/> No | <input type="text"/> <input type="text"/> years |
| Angina pectoris (chest pain)                | <input type="checkbox"/> Yes | <input type="checkbox"/> No | <input type="text"/> <input type="text"/> years |
| Heart failure                               | <input type="checkbox"/> Yes | <input type="checkbox"/> No | <input type="text"/> <input type="text"/> years |
| Other heart disease                         | <input type="checkbox"/> Yes | <input type="checkbox"/> No | <input type="text"/> <input type="text"/> years |
| Stroke/brain haemorrhage                    | <input type="checkbox"/> Yes | <input type="checkbox"/> No | <input type="text"/> <input type="text"/> years |
| Kidney disease                              | <input type="checkbox"/> Yes | <input type="checkbox"/> No | <input type="text"/> <input type="text"/> years |
| Asthma                                      | <input type="checkbox"/> Yes | <input type="checkbox"/> No | <input type="text"/> <input type="text"/> years |
| Chronic bronchitis, emphysema or COPD       | <input type="checkbox"/> Yes | <input type="checkbox"/> No | <input type="text"/> <input type="text"/> years |
| Diabetes                                    | <input type="checkbox"/> Yes | <input type="checkbox"/> No | <input type="text"/> <input type="text"/> years |
| Psoriasis                                   | <input type="checkbox"/> Yes | <input type="checkbox"/> No | <input type="text"/> <input type="text"/> years |
| Eczema on hands                             | <input type="checkbox"/> Yes | <input type="checkbox"/> No | <input type="text"/> <input type="text"/> years |
| Cancer                                      | <input type="checkbox"/> Yes | <input type="checkbox"/> No | <input type="text"/> <input type="text"/> years |
| Epilepsy                                    | <input type="checkbox"/> Yes | <input type="checkbox"/> No | <input type="text"/> <input type="text"/> years |
| Arthritis (rheumatoid arthritis)            | <input type="checkbox"/> Yes | <input type="checkbox"/> No | <input type="text"/> <input type="text"/> years |
| Bechterew's disease                         | <input type="checkbox"/> Yes | <input type="checkbox"/> No | <input type="text"/> <input type="text"/> years |
| Sarcoidosis                                 | <input type="checkbox"/> Yes | <input type="checkbox"/> No | <input type="text"/> <input type="text"/> years |
| Osteoporosis                                | <input type="checkbox"/> Yes | <input type="checkbox"/> No | <input type="text"/> <input type="text"/> years |
| Fibromyalgia                                | <input type="checkbox"/> Yes | <input type="checkbox"/> No | <input type="text"/> <input type="text"/> years |
| Degenerative joint disease (osteoarthritis) | <input type="checkbox"/> Yes | <input type="checkbox"/> No | <input type="text"/> <input type="text"/> years |
| Mental health problems you sought help for  | <input type="checkbox"/> Yes | <input type="checkbox"/> No | <input type="text"/> <input type="text"/> years |
| Hypothyroidism (too low metabolism)         | <input type="checkbox"/> Yes | <input type="checkbox"/> No | <input type="text"/> <input type="text"/> years |
| Hyperthyroidism (too high metabolism)       | <input type="checkbox"/> Yes | <input type="checkbox"/> No | <input type="text"/> <input type="text"/> years |
| Cataract                                    | <input type="checkbox"/> Yes | <input type="checkbox"/> No | <input type="text"/> <input type="text"/> years |
| Glaucoma (raised eye pressure)              | <input type="checkbox"/> Yes | <input type="checkbox"/> No | <input type="text"/> <input type="text"/> years |

**Thank you for taking the time to answer the questions,  
and remember to mail in your answers!**
